# Supplementary material for: A multicopy sRNA of Listeria monocytogenes regulates expression of the virulence adhesin LapB
Source: PubMed Central journal article supplement (PMC4132741; doi:10.1093/nar/gku630), 2014-07-17
Supplement: supp_gku630_nar-00725-v-2014-File009.pdf [file supp_gku630_nar-00725-v-2014-File009.pdf]

**A multicopy sRNA of *Listeria monocytogenes* regulates expression of  
the virulence adhesin LapB**

Susanne Sievers, Eva Maria Sternkopf Lillebæk, Kirstine Jacobsen, Anja Lund, Maria Storm Mollerup, Pia Kiil Nielsen and Birgitte Haahr Kallipolitis\*

Department of Biochemistry and Molecular Biology, University of Southern Denmark, Odense, Denmark

\*corresponding author: Department of Biochemistry and Molecular Biology, University of Southern Denmark, Odense, Denmark. Tel.: +45 6550 2372. E-mail: bhk@bmb.sdu.dk

***Supplementary Data***

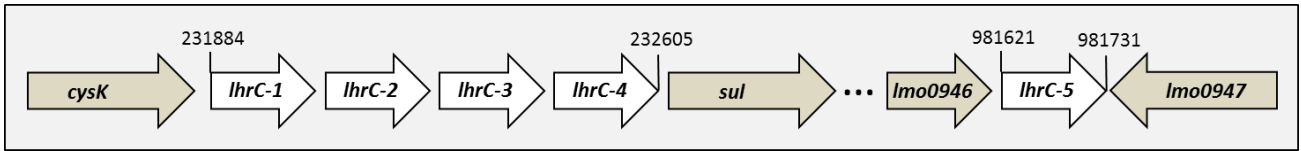

**Figure S1. Schematic location of *lhrC*.** All five copies of *lhrC* are encoded on the positive DNA strand, *lhrC1* to *lhrC4* clustered, but *lhrC5* at a distant site. The gene map is according to Genolist (1). Scaling and distances do not reflect reality. An overview of the genetic organization of *lhrC* in various *L. monocytogenes* serotypes and non-pathogenic *Listeria* species was provided by Mraheil *et al.* (2).

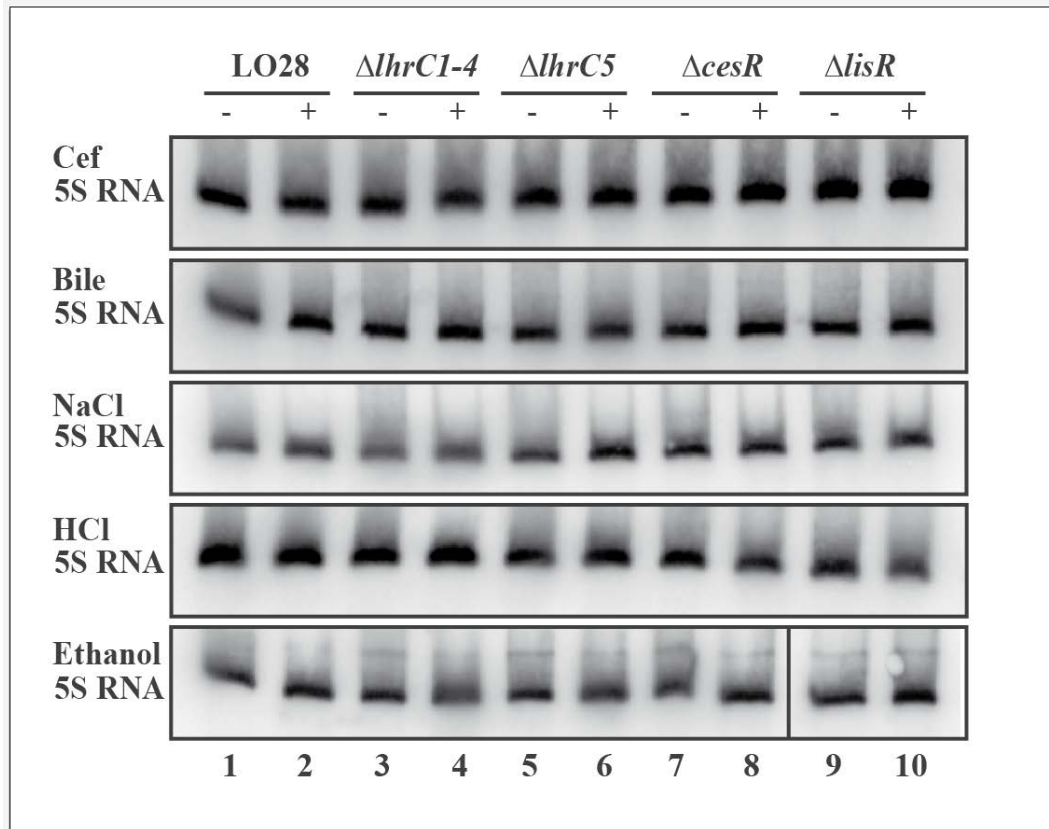

**Figure S2A. Northern blot probed for 5S rRNA.** Loading control for northern blot analysis of LhrC shown in Figure 1A. Samples were taken from *L. monocytogenes* LO28 wild type (lane 1, 2),  $\Delta lhrC1-4$  (lane 3, 4),  $\Delta lhrC5$  (lane 5, 6),  $\Delta cesR$  (lane 7, 8) and  $\Delta lisR$  (lane 9, 10) from cultures stressed with various agents acting on the cell envelope (+) as well as from control samples without stress (-).

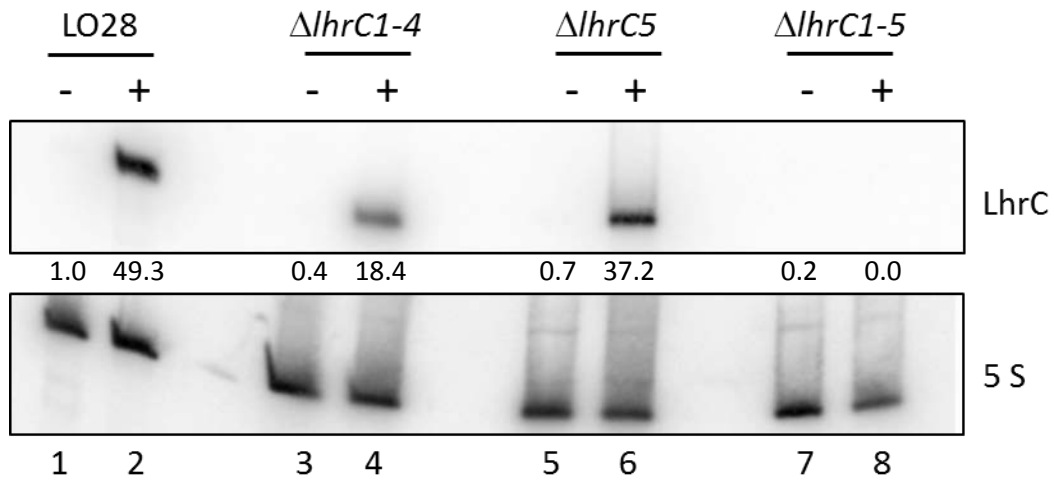

**Figure S2B. Absence of LhrC in  $\Delta lhrC1-5$  checked by Northern blot analysis.** Samples were taken from *L. monocytogenes* LO28 wild type (lanes 1 and 2),  $\Delta lhrC1-4$  (lanes 3 and 4),  $\Delta lhrC5$  (lanes 5 and 6) and  $\Delta lhrC1-5$  (lanes 7 and 8) from cultures stressed with 4  $\mu\text{g}/\text{mL}$  cefuroxime (+) as well as from control cultures without stress (-). The Northern blot was probed for LhrC1-5 and 5S rRNA (loading control). The levels of LhrC were normalized to 5 S.

**A**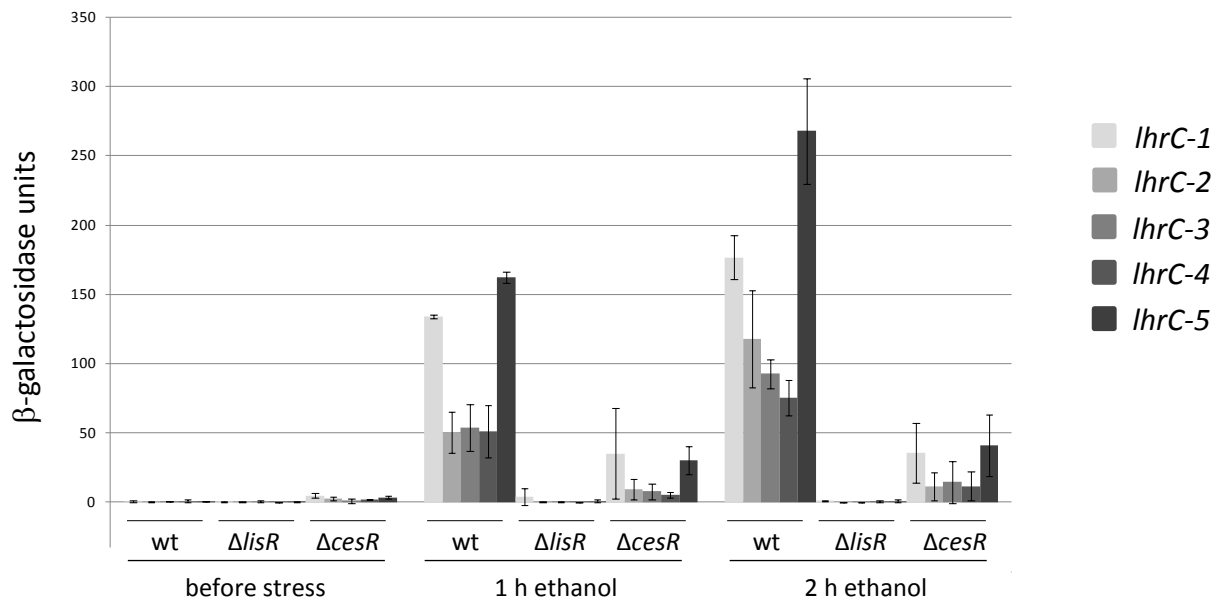**B**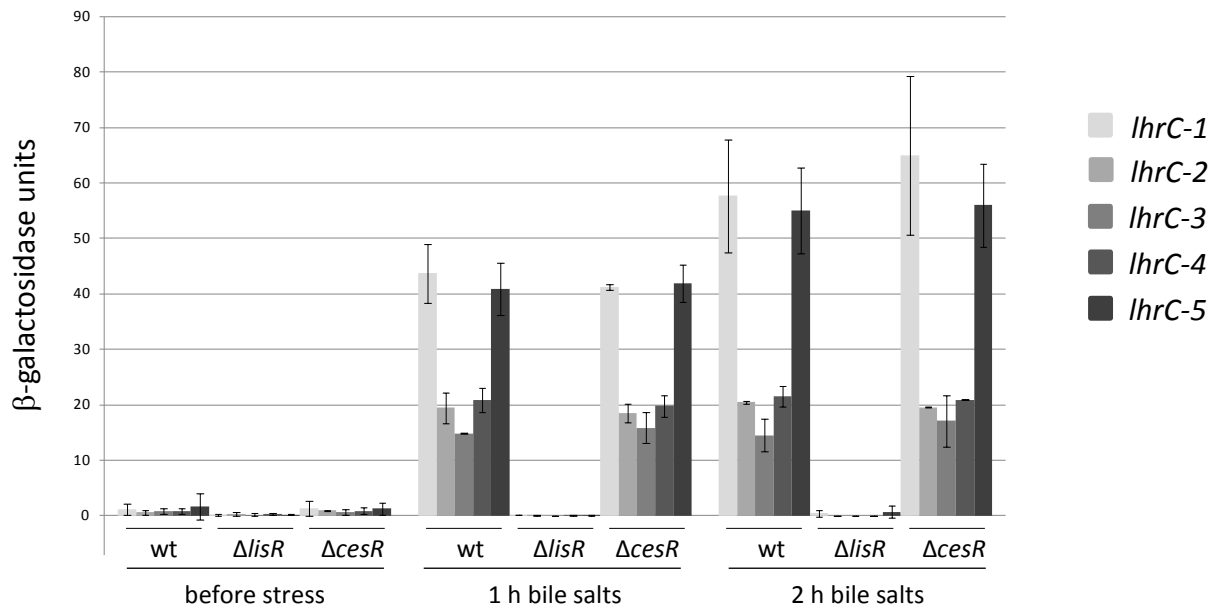

**Figure S3. Transcriptional reporter gene fusions of *lhrC* promoters.** Reporter fusions were tested in LO28 wild type (wt),  $\Delta lisR$  and  $\Delta cesR$  strains. Cultures were grown up to  $OD_{600}=0.35$  and stressed with ethanol (A) and bile salts (B), after control samples had been taken. Further samples for  $\beta$ -gal assays were withdrawn after 1 and 2 h of ongoing stress. Results represent the average of two biologically independent experiments, each in technical duplicates.

**A**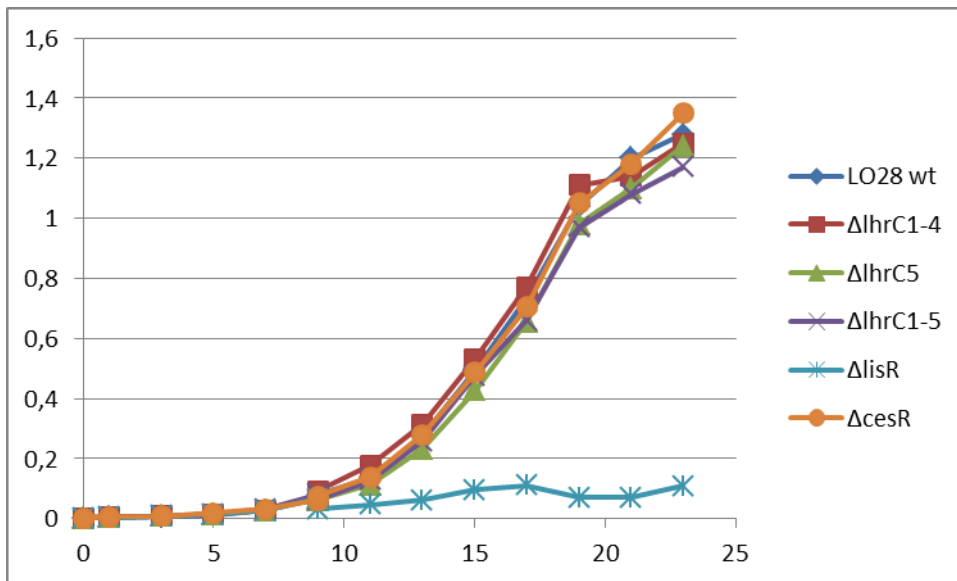**B**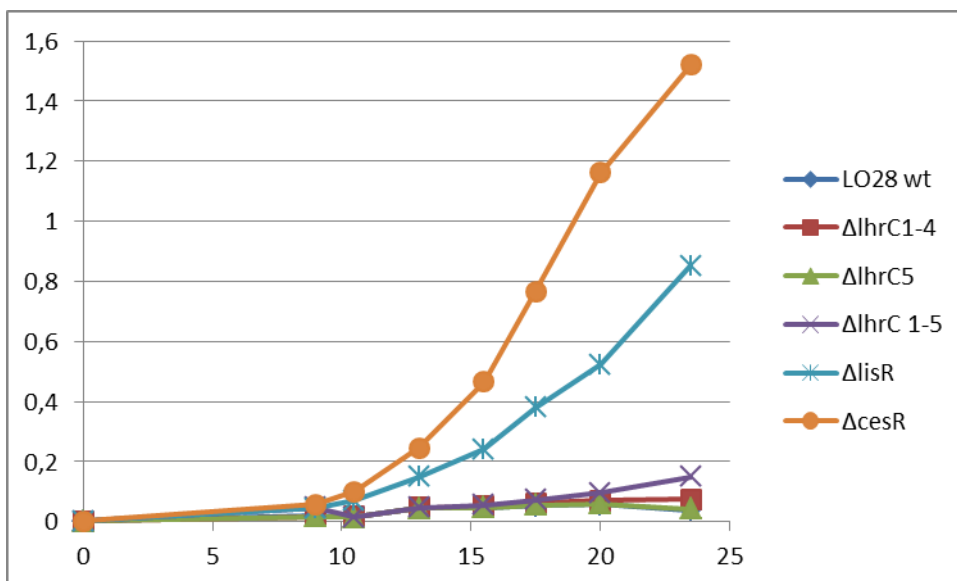

**C**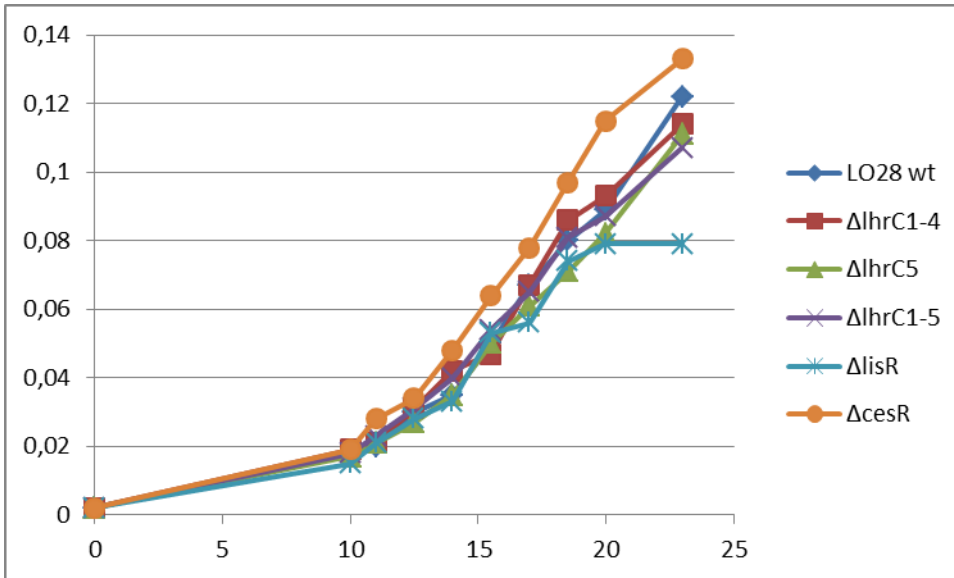**D**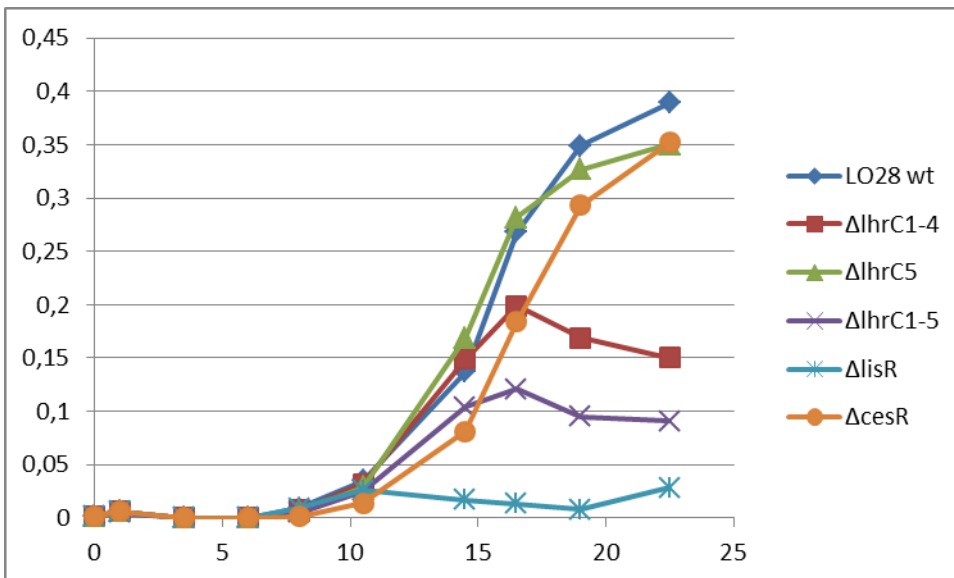

**Figure S4. Stress tolerance assays.** Overnight cultures were diluted 1000-fold into BHI adjusted with (A) acid (pH 5), (B) ethanol (5%), (C) NaCl (8%) or (D) bile salts (0.07%). Growth was monitored up to 24 hours. The result from one representative growth experiment is shown. Each experiment was repeated twice with similar results.

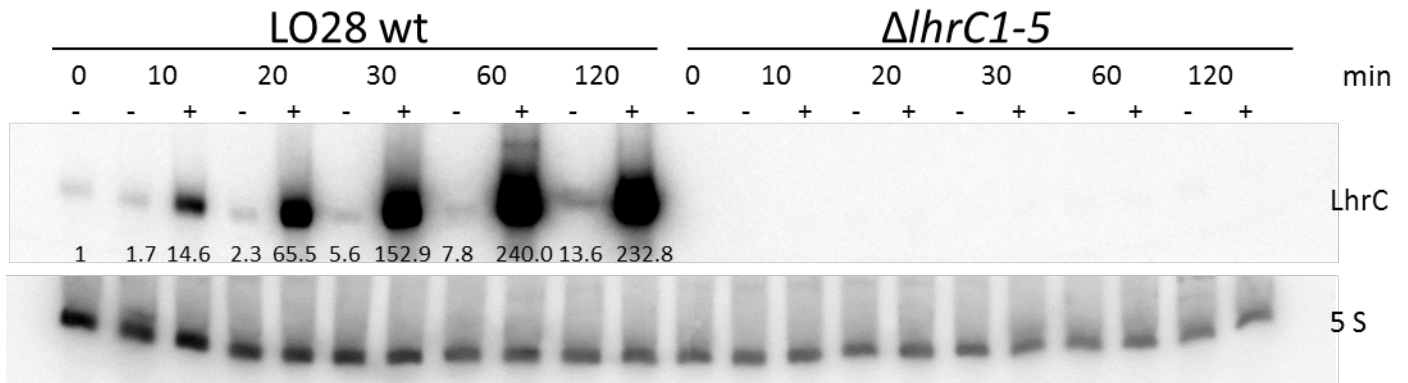

**Figure S5. LhrC induction profile.** At time = 0, corresponding to  $OD_{600} = 0.35$ , *L. monocytogenes* LO28 wild type and  $\Delta lhrC1-5$  cells were treated with 4  $\mu\text{g/ml}$  cefuroxime. Samples were harvested at several time points (0, 10, 20, 30, 60 and 120 min relative to the addition of cefuroxime) and total RNA was prepared for northern blot analyses, probing for LhrC1-5 as well as 5S rRNA (loading control). Levels of LhrC were normalized to 5S. No LhrC was detected in the  $\Delta lhrC1-5$  strain. In the wild type strain the highest amount of LhrC was observed after 1 h of stress. Also the strongest fold of induction of LhrC compared to the non-stress condition was taking place 1 h after stress was set (30 fold).



**A**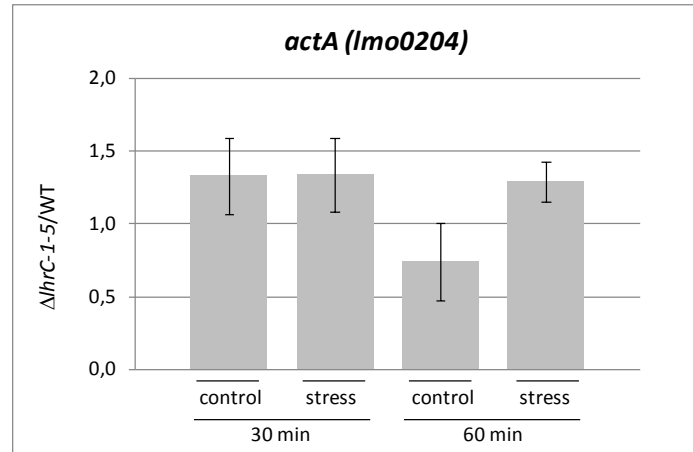**B**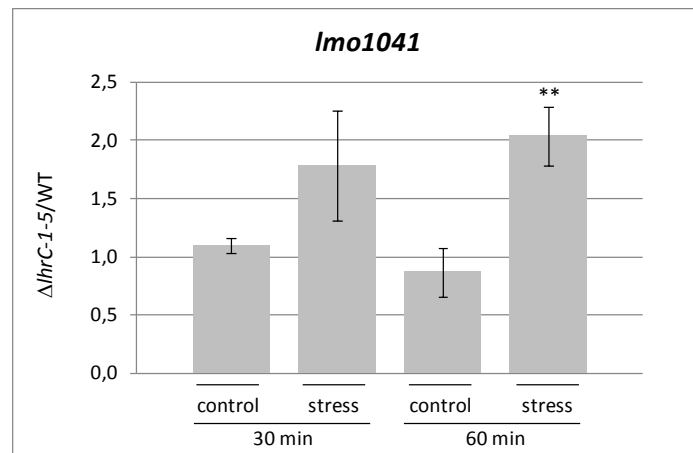**C**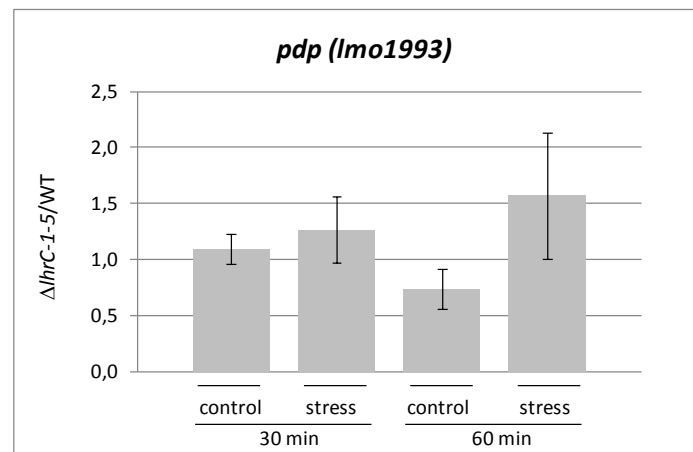

**Figure S6A. RT-qPCR analysis of *actA* (A), *Imo1041* (B) and *pdp* (C).** At  $OD_{600} = 0.35$ , wild type and  $\Delta hrC1-5$  cultures were split and half of the cultures were treated with 4  $\mu\text{g}/\text{mL}$  cefuroxime (stress) whereas the other half was left untreated (control). Samples were harvested 30 and 60 min after the addition of cefuroxime and total RNA was prepared for qRT-PCR analysis in three independent experiments. Two asterisks indicate a significant increase of the ratio under stress conditions compared to the corresponding control, with  $P < 0.005$ .

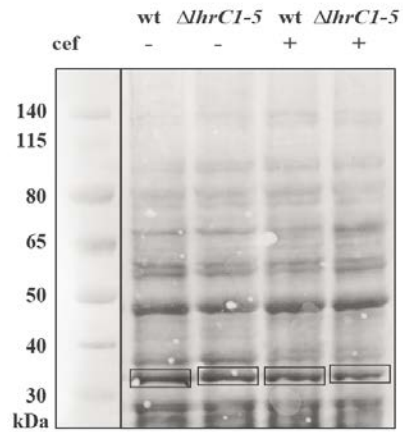

**Figure S6B. Amido black stained western blot membrane.** Loading control for western blot analysis of LapB shown in Figure 3B. Samples were taken 2 h post treatment with cefuroxime (4  $\mu\text{g/ml}$ ) from wild type (wt) and  $\Delta hrC1-5$ , but also from unstressed cultures. Surface protein enriched extracts were separated via 1D-PAGE. Bands quantified for normalization of LapB levels are boxed.

5' -<sup>-35</sup>cttgctttttt<sup>-10</sup>**caagaacaatagtaaaataagttata**tcaagtttgtcatagataaaataggg  
 gaataacatgacaatagcttttaggaatggggataaaataattgggggacttttaaaaaagggagat  
 ggggatgaatgaaaagtaaattttttataggcatgatgac — *lacZ*

**Figure S7. The pC-*lapB-lacZ* construct.** The core promoter region of the *lhrA* gene (bold) was fused to a fragment extending from -100 to +32 relative to the *lapB* translational start site (atg is underlined). The resulting fragment was fused in frame to *lacZ* in the translational fusion vector pCK-lac (3).

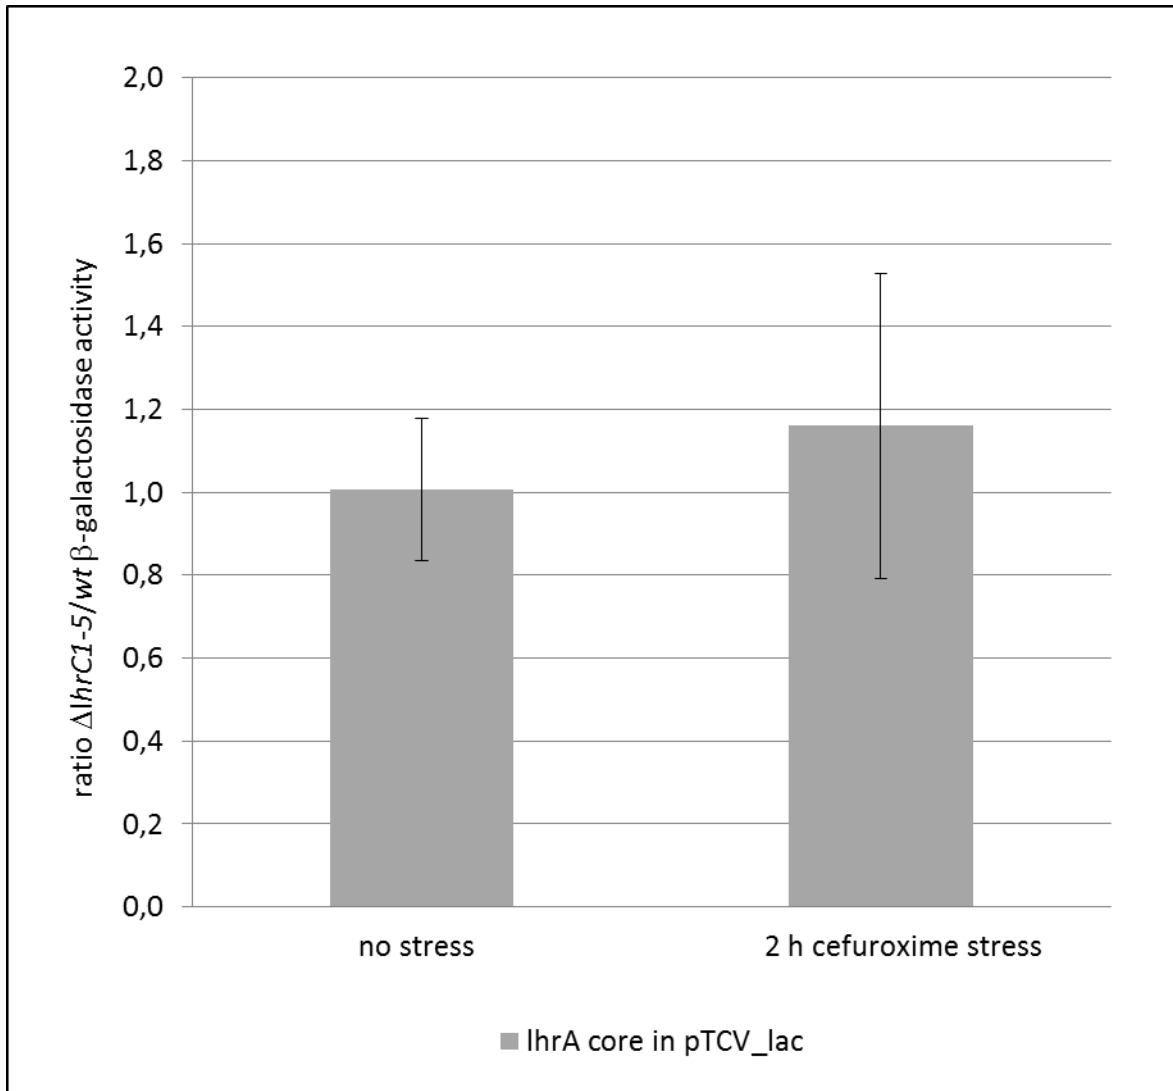

**Figure S8. The core promoter is not affected by LhrC.** The *lhrA* core promoter was fused to *lacZ* in the transcriptional fusion vector pTCV-lac (4). Transcriptional regulation of the core promoter in wild type and  $\Delta$ lhrC1-5 was similar under control conditions as well as after cefuroxime stress. Results are the average of two biologically independent experiments, each in technical duplicates.

## Cefuroxime

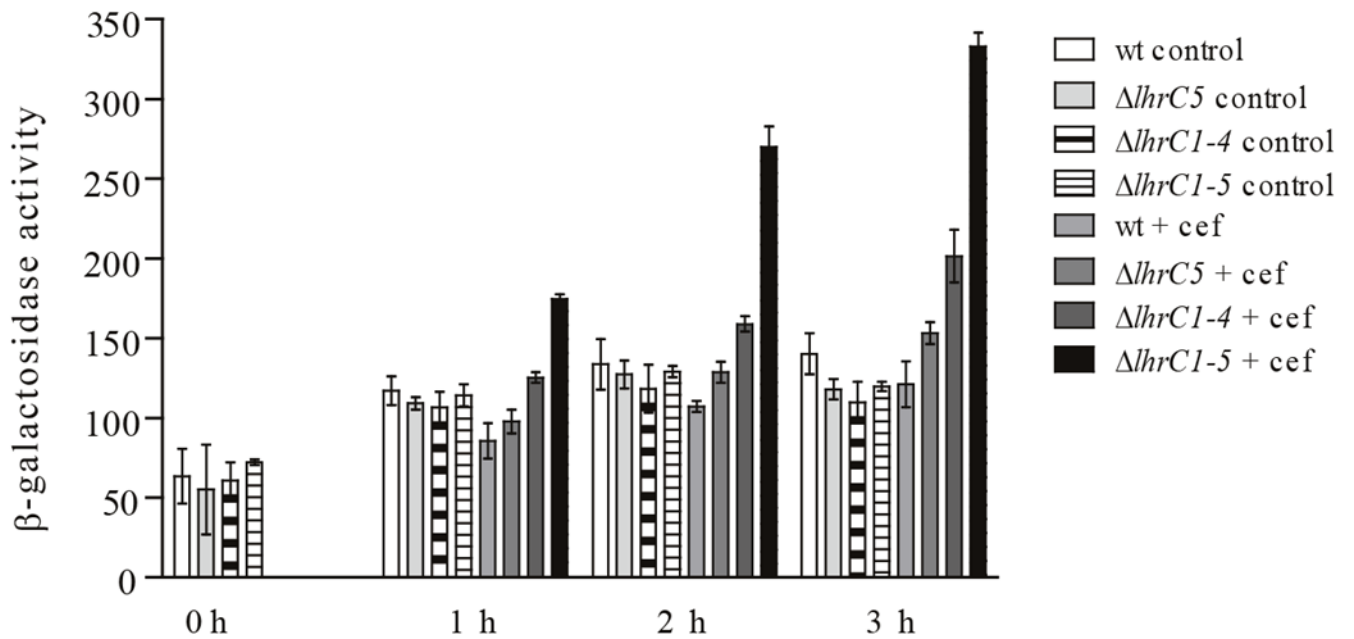

**Figure S9. Testing the effect of LhrC1-4 and LhrC5 on *lapB-lacZ* expression.** β-galactosidase assay of pC-*lapB-lacZ* in strains lacking LhrC1-4 or LhrC5 was compared to LO28 wild type and the mutant strain lacking all five copies of LhrC. Cells were grown to  $OD_{600} = 0.2$  and cells were sampled (0 h) before the cultures were split. One sub-culture was treated with cefuroxime (cef) to a final concentration of 4 μg/ml whereas the other one was left untreated (control). Samples were taken at 1, 2 and 3 hours relative to the onset of cefuroxime exposure. Results are the average of three biological experiments, each performed in duplicate.



| 1    | 2    | 3    | 4    | 5    | 6    | 7    | 8    | 9    | 10   | 11   | 12   | Sample                  |
|------|------|------|------|------|------|------|------|------|------|------|------|-------------------------|
| -    | -    | -    | -    | -    | -    | +    | +    | +    | +    | +    | +    | 10 $\mu$ M Hfq          |
| 500  | 0    | 4    | 20   | 100  | 500  | 500  | 0    | 4    | 20   | 100  | 500  | nM <i>lapB</i>          |
| 125  | -    | -    | 5    | 25   | 125  | 125  | -    | -    | 5    | 25   | 125  | Fold excess <i>lapB</i> |
| 0.28 | 1.00 | 0.96 | 0.93 | 0.34 | 0.13 | 0.20 | 1.00 | 1.00 | 0.57 | 0.22 | 0.06 | Unbound LhrC            |

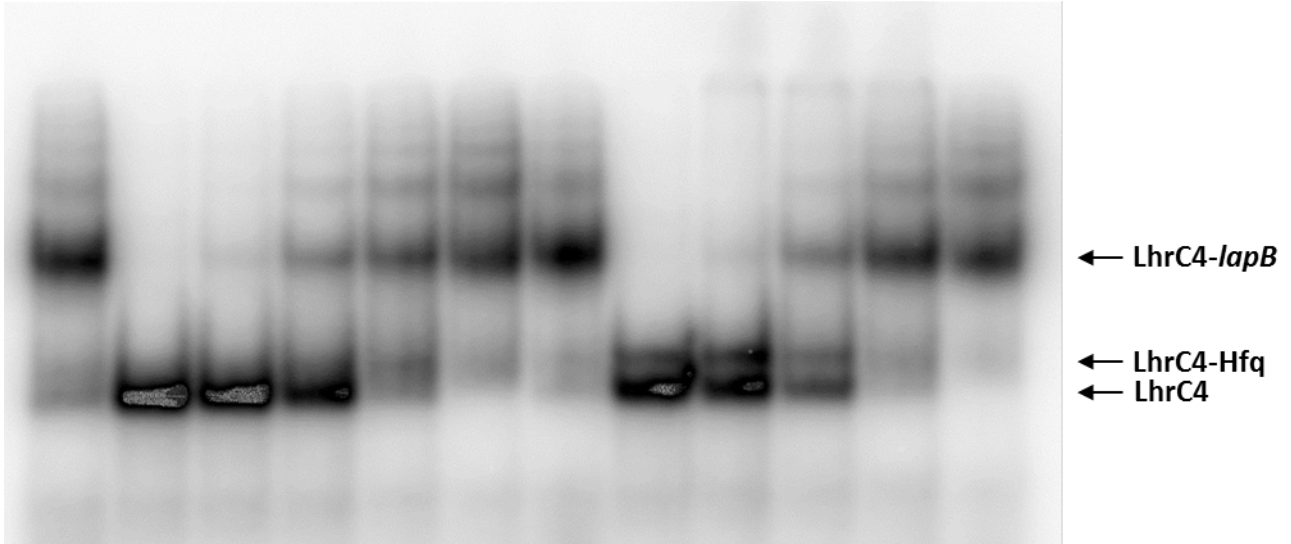

**Figure S11. Role of Hfq in LhrC4-*lapB* binding.** Labelled LhrC4 was shifted with increasing amounts of *lapB*, in the absence (lanes 1 to 6) or presence of 10  $\mu$ g/ml Hfq (lanes 7 to 12). “Fold excess *lapB*” refer to the amount of *lapB* RNA added to each sample, relative to the amount of labelled LhrC. In lanes 1 and 7, RNAs were heat-denatured before allowing them to interact to form the most stable complex. The level of LhrC not bound to *lapB* is show (“unbound LhrC”).

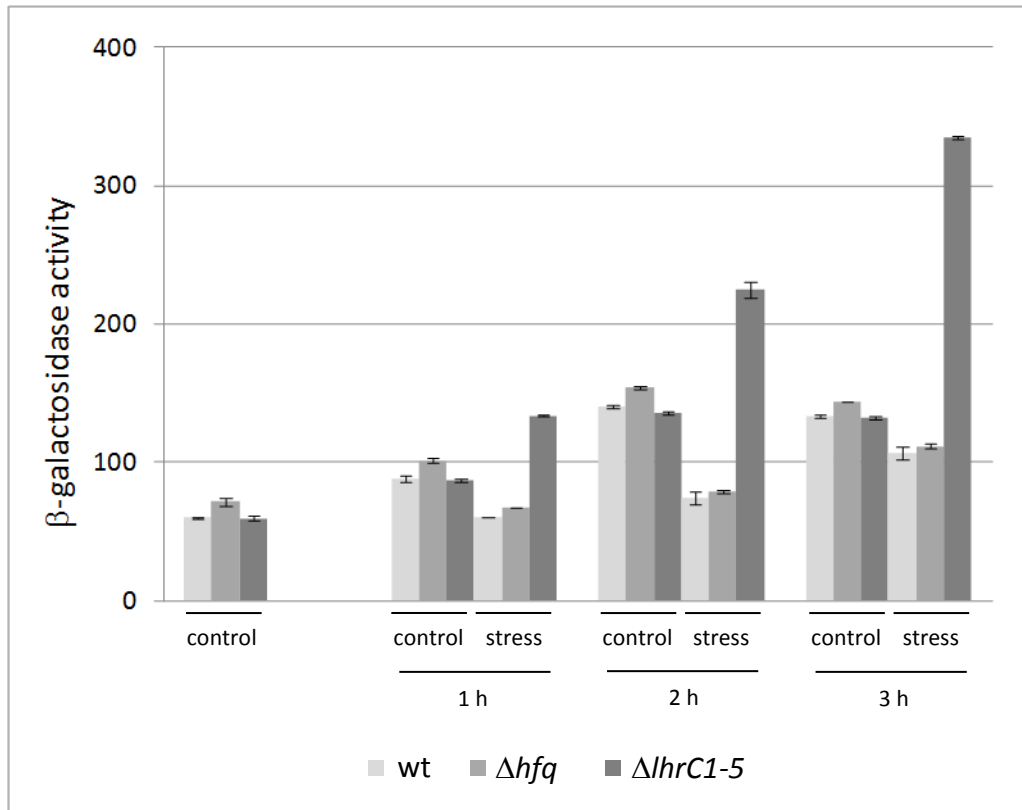

**Figure S12. pC-lapB-lacZ in a Δhfq background.** LO28 wild type, Δhfq and ΔlhrC1-5 strains carrying pC-lapB-lacZ were grown to OD<sub>600</sub> = 0.2 (control). The culture was split in two and 4 μg/ml cefuroxime was added to one of the cultures. After 1, 2 and 3 hours of growth, samples were taken from the unstressed cultures (control) and cultures exposed to cefuroxime (stress). β-galactosidase activity in Δhfq was comparable to wild type, but not to ΔlhrC1-5 background, where it was significantly increased after cefuroxime stress. Hence, LhrC is capable of regulating expression from pC-lapB-lacZ despite the absence of Hfq. Results are the average of two biologically independent experiments, each in technical duplicates.



**A**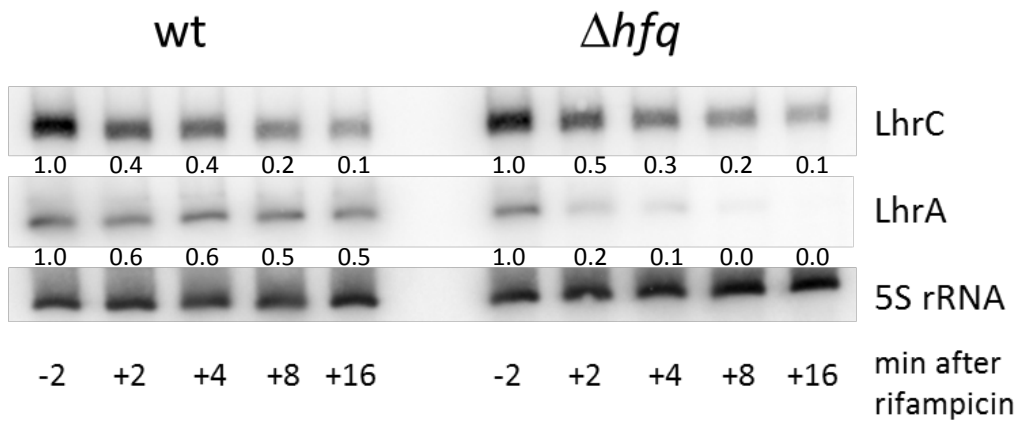**B**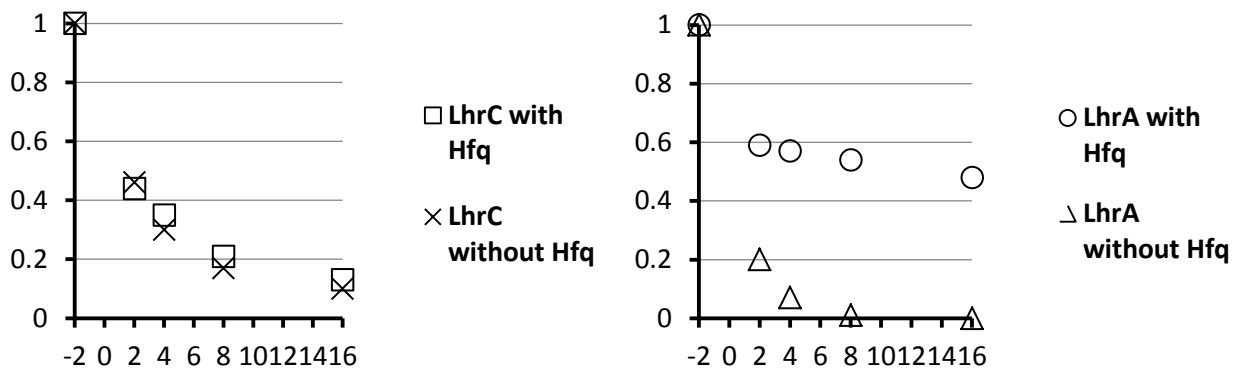

**C**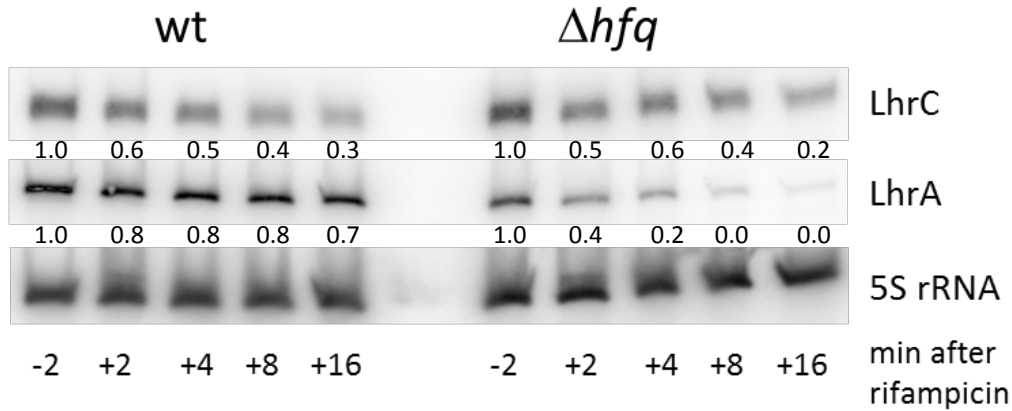**D**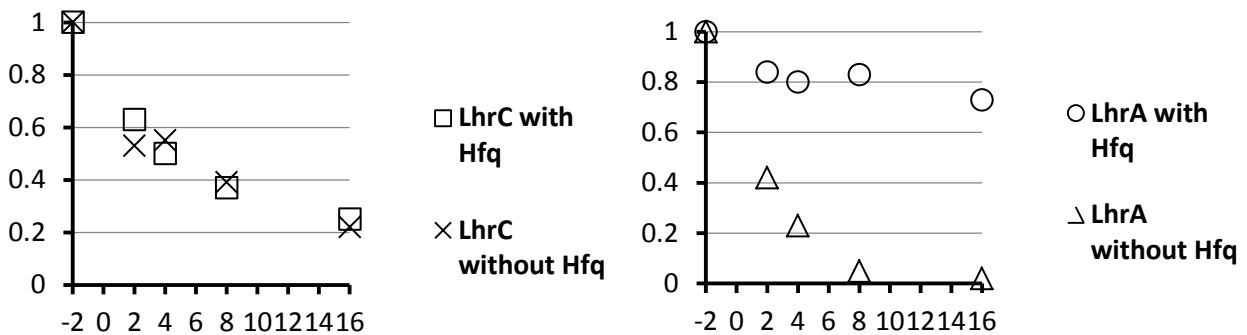

**Figure S13. The effect of Hfq on LhrC stability.** RNA was extracted from *L. monocytogenes* LO28 wild type and  $\Delta hfq$  cells stressed with cefuroxime (A) or bile salts (C) for 30 min before transcription was inhibited by the addition of rifampicin (10  $\mu\text{g}/\text{ml}$ ). Samples were taken shortly before rifampicin addition (-2 min) and in a time course afterwards. As a positive control, LhrA, a sRNA whose stability was earlier reported to be dependent on Hfq was probed for (5). 5S rRNA is shown as a loading control. The levels of LhrC and LhrA (normalized to 5S) are shown below the bands. A graphical representation of normalized LhrC and LhrA levels are shown in (B) for stress with cefuroxime and (D) for bile salts. The estimated half-life for LhrC subjected to either cefuroxime or bile salt stress is 2-3 min, independent of the presence or absence of Hfq. For LhrA in the wild type strain, the half-life is equal to or longer than 16 min for cefuroxime and bile stress, respectively, but in the absence of Hfq, the half-life is greatly reduced, estimated to less than 2 min. All three RNAs were detected on the same northern blot with intermediate membrane stripping.

**LhrC**

AUAAGCUAACAACAAACAAAACAUUUUCAUUCUUCUCCCCCUUUUAGAAUGAAAAUCCCAAACUCCCUUUUUUGACCGA  
UGCGGUUUACUCCCUUUUCCGCAUCGGUUUUUUU

**LhrC\_mut\_2**

AUAAGCUAACAACAAACAAAACAUUUUCAUUCUUCUCCCCCUUUUAGAAUGAAAAUAGAACAGAAGGAACCCCGACCGA  
UGCGGUUUACUCCCUUUUCCGCAUCGGUUUUUUU

**LhrC\_mut\_3**

AUAAGCUAACAACAAACAAAACAUUUUCAUUCUUCUCCCCCUUUUAGAAUGAAAAUCCCAAACUCCCUUUUUUGACCGA  
UGCGGACUAGAGGGAAAACCGCAUCGGUUUUUUU

**LhrC\_mut\_4**

AUAAGCUAACAACAAACAAAACAUUUUCAUUCUAAUGGCGGGAAAAAGAAUGAAAAUCCCAAACUCCCUUUUUUGACCGA  
UGCGGUUUACUCCCUUUUCCGCAUCGGUUUUUUU

**LhrC\_mut\_5**

AUAAGCUAACAACAAACAAAACAUUUUCAUUCUUCUCCCCCUUUUAGAAUGAAAAUAGAACAGAAGGAACCCCGACCGA  
UGCGGACUAGAGGGAAAACCGCAUCGGUUUUUUU

**LhrC\_mut\_6**

AUAAGCUAACAACAAACAAAACAUUUUCAUUCUAAUGGCGGGAAAAAGAAUGAAAAUAGAACAGAAGGAACCCCGACCGA  
UGCGGUUUACUCCCUUUUCCGCAUCGGUUUUUUU

**LhrC\_mut\_7**

AUAAGCUAACAACAAACAAAACAUUUUCAUUCUAAUGGCGGGAAAAAGAAUGAAAAUAGAACAGAAGGAACCCCGACCGA  
UGCGGACUAGAGGGAAAACCGCAUCGGUUUUUUU

**LhrC\_mut\_8**

AUAAGCUAACAACAAACAAAACAUUUUCAUUCUAAUGGCGGGAAAAAGAAUGAAAAUCCCAAACUCCCUUUUUUGACCGA  
UGCGGACUAGAGGGAAAACCGCAUCGGUUUUUUU

**Figure S14. Overview of substitutions in LhrC\_mut\_2 through LhrC\_mut\_8.** Shown are the sequences of LhrC wild type and mutant derivatives tested for their ability to bind *lapB* mRNA in the experiment presented in Figure 5. The mutated regions are underlined.

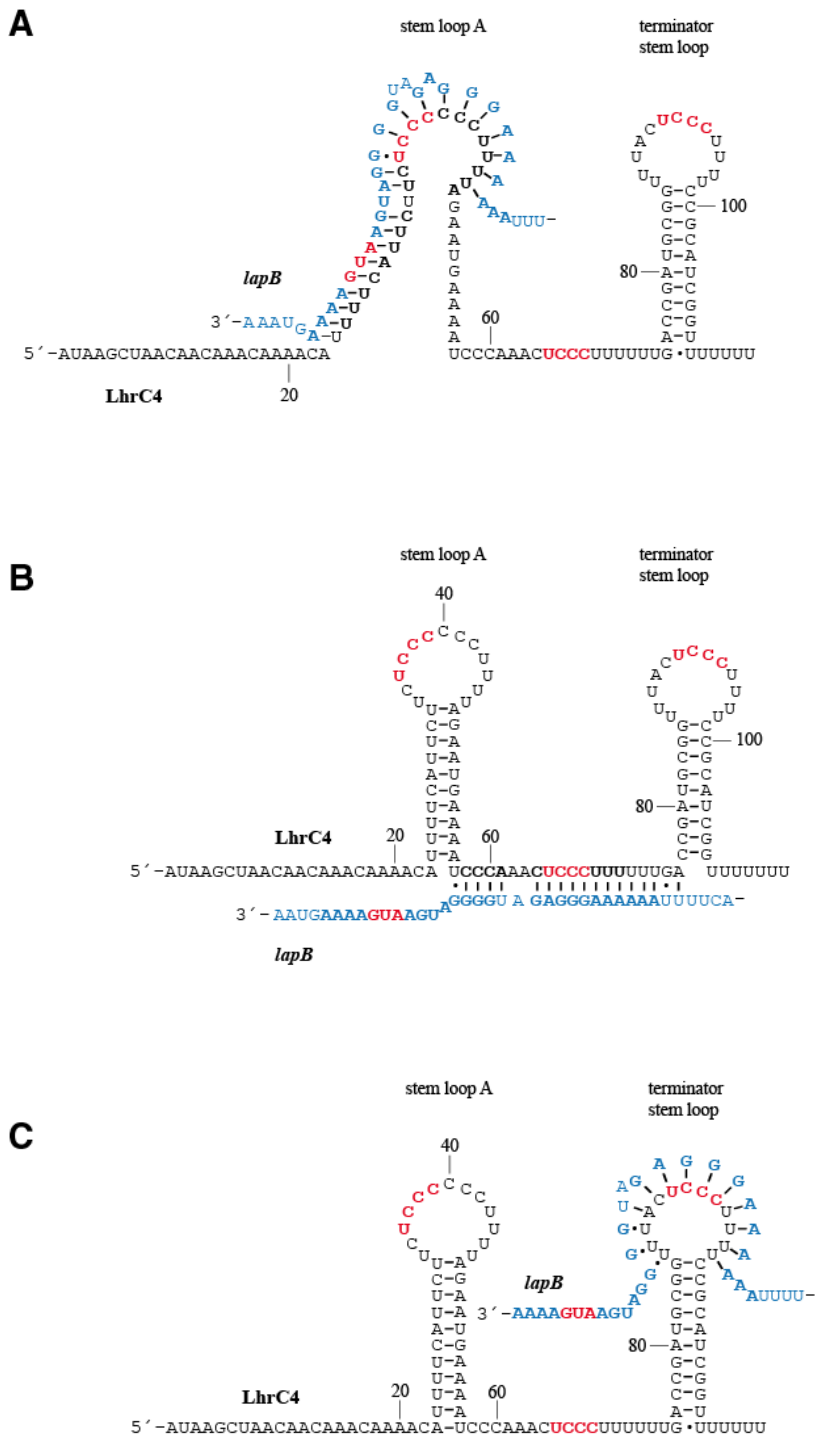

**Figure S15. Detailed model of LhrC4-*lapB* mRNA interaction.** Deduced base pairing of *lapB* mRNA and loop A (A), the single stranded stretch (B) and the terminator loop (C) of LhrC4, respectively. The *lapB* mRNA is shown in blue and the start codon is marked in red. The *lapB* mRNA and LhrC4 sequence found to be bound in structure probing experiments is printed in bold. The UCCC motif in LhrC4 is shown in red.



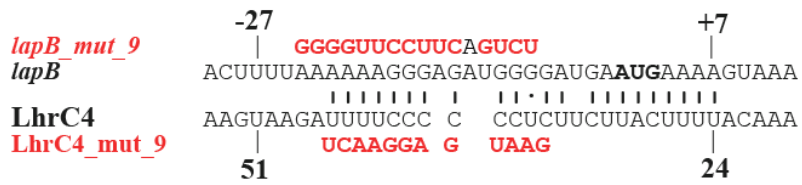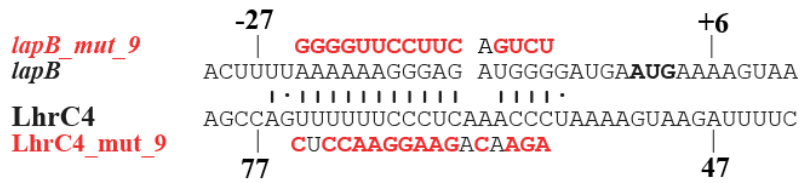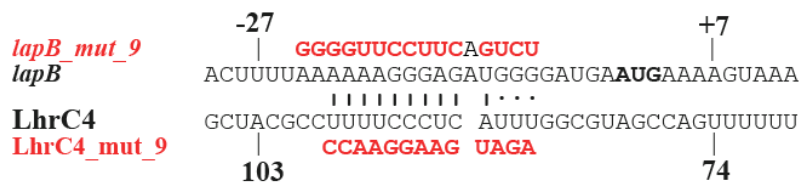

**Figure S17. Schematic overview of substitutions in *lapB\_mut9* and LhrC4\_mut9.** The three possible interactions of *lapB* with LhrC4 stem-loop A (upper panel), LhrC4 single stranded spacer region (middle panel) and LhrC4 terminator (lower panel), respectively, are shown. The mutations in *lapB\_mut\_9* and LhrC4\_mut\_9 are indicated in red.

**Table S1. Primers used in this study.**

| Name                                                    | Sequence (5'→3')                                            | Further information                                                    |
|---------------------------------------------------------|-------------------------------------------------------------|------------------------------------------------------------------------|
| <b><i>NB probes</i></b>                                 |                                                             |                                                                        |
| lhrC_probe                                              | AATGAAAATGTTTTGCTTGTTGTTAGCTTAT                             | also for detection of LhrC4_mut                                        |
| lhrA_probe                                              | TTGCCATCATGTTCCGGGC                                         |                                                                        |
| 5S_probe_Lmo                                            | GAGAAGCTTAACTACCGTGTTCCGGGATGGGAACGG                        |                                                                        |
| 5S_probe_Eco                                            | CTACGGCGTTTCACTTCTGAGTCCCGTATGTAGCATC<br>ACCTTC             |                                                                        |
| <b><i>in-frame deletions</i></b>                        |                                                             |                                                                        |
| lhrC1-4_up_fw                                           | GGGGGAATCCCAGTACTTAGTGCGGTTCTCC                             | used in PCR I and III for ΔlhrC1-4 construction                        |
| lhrC1-4_up_rev                                          | CCAAGAAAAGAAAAGTTTCTGCTGTGC                                 | used in PCR I for ΔlhrC1-4 construction; overlaps with lhrC1-4_down_fw |
| lhrC1-4_down_fw                                         | CACAGCAGAAACTTTCTTTTCTGGGTGCGCTAAAAT<br>CACTAAATTCTGC       | used in PCR II for ΔlhrC1-4 construction; overlaps with lhrC1-4_up_rev |
| lhrC1-4_down_rev                                        | GGGGGGATCCCATATCAGCTCCCGTAAGATAGCC                          | used in PCR II and III for ΔlhrC1-4 construction                       |
| lhrC5_up_fw                                             | GGGGTCTAGATTGCCGAGCGACCATATCAG                              | used in PCR I and III for ΔlhrC5 construction                          |
| lhrC5_up_rev                                            | ACATATAATAACTTTTCTAAAAAGAATGTGC                             | used in PCR I for ΔlhrC5 construction; overlaps with lhrC5_down_fw     |
| lhrC5_down_fw                                           | GCACATTCTTTTTAGAAAAGTTATTATATGTATGCGC<br>AAAAATCACTTTTCTGAG | used in PCR II for ΔlhrC5 construction; overlaps with lhrC5_up_rev     |
| lhrC5_down_rev                                          | CCCCGAATCCCAGGACGAATGAAAAATCAGC                             | used in PCR II and III for ΔlhrC5 construction                         |
| lhrC1-4_flank_fw                                        | CGTACTTAAAAAGAACTACCCAGACG                                  | flanking primer of lhrC1-4 locus for mutant verification               |
| lhrC1-4_flank_rev                                       | CGGTACATCGTATTTTGCAGC                                       | flanking primer of lhrC1-4 locus for mutant verification               |
| lhrC5_flank_fw                                          | GCATTAATTTAAATACAGCATCTAGTGAAG                              | flanking primer of lhrC5 locus for mutant verification                 |
| lhrC5_flank_rev                                         | GGTTATGCCGATTACGTTTATTATTC                                  | flanking primer of lhrC5 locus for mutant verification                 |
| hfq_A                                                   | GGGGTCTAGAGAAGGTTTAGTGACAGAAGCG                             | used in PCR I and III for Δhfq construction                            |
| hfq_B                                                   | CATAATTTCCCTCTCCAATCTC                                      | used in PCR I for Δhfq construction; overlaps with hfq_C               |
| hfq_C                                                   | GAGATTGGAGAGGGAAATTATGCCTGATGCGGAATA<br>AGCAC               | used in PCR II for Δhfq construction; overlaps with hfq_B              |
| hfq_D                                                   | CCCCGGATCCAGCCGAAATATTGCGCAC                                | used in PCR II and III for Δhfq construction                           |
| hfq_flank_fw                                            | GGAGTATCAAGTGCATAATGTAC                                     | flanking primer of hfq locus for mutant verification                   |
| hfq_flank_rev                                           | GGTAAAAGATATTTATATTGCGC                                     | flanking primer of hfq locus for mutant verification                   |
| <b><i>transcriptional and translational fusions</i></b> |                                                             |                                                                        |
| lhrC1_p_fw                                              | GGGGGAATTCGAACGCTACTTAAGCACGC                               | transcriptional fusion of lhrC1 promoter in pTCV-lac                   |

Table S1, continued

|                         |                                                                                              |                                                                                                   |
|-------------------------|----------------------------------------------------------------------------------------------|---------------------------------------------------------------------------------------------------|
| <b>lhrC1_p_rev</b>      | GGGGGGATCCGCTTATGACTATATATTAACCAAGA                                                          | transcriptional fusion of lhrC1 promoter in pTCV-lac                                              |
| <b>lhrC2_p_fw</b>       | GGGGGGAATTCTCCCTTTTCCACACTGGTTTTTAAT<br>GCGAAAAATGAAAAGAAAAACCGAGAAATCTCATGA<br>AACTTTAAC    | transcriptional fusion of lhrC2 promoter in pTCV-lac                                              |
| <b>lhrC2_p_rev</b>      | GGGGGGATCCGCTTATGACTATATATTAACCAAGTTT<br>TTGGTGGATACGCTGTGACTTTTGTAAAGTTTCATG<br>AGATTTCTCGG | transcriptional fusion of lhrC2 promoter in pTCV-lac                                              |
| <b>lhrC3_p_fw</b>       | GGGGGAATTCCCTTTTCCACACTGGTTTTTTG                                                             | transcriptional fusion of lhrC3 promoter in pTCV-lac                                              |
| <b>lhrC3_p_rev</b>      | GGGGGATCCGCTTATAACTATATATTAACCAAGTTTT<br>T                                                   | transcriptional fusion of lhrC3 promoter in pTCV-lac                                              |
| <b>lhrC4_p_fw</b>       | GGGGGGAATTCTCCCTTTTCCACACTGGTTTTTTGAT<br>GCAAAAAATGAAAAGAAAAACCGAGAAATCTCATGA<br>AACTTTAAC   | transcriptional fusion of lhrC4 promoter in pTCV-lac                                              |
| <b>lhrC4_p_rev</b>      | GGGGGGATCCGCTTATGACTATATATTAACCAAGTTT<br>TCGGTGGATACGCTGTGATATTTGTAAAGTTTCATG<br>AGATTTT     | transcriptional fusion of lhrC4 promoter in pTCV-lac                                              |
| <b>lhrC5_p_fw</b>       | GGGGAATTCGAAAAATAGGATTGCAGAAAAGC                                                             | transcriptional fusion of lhrC5 promoter in pTCV-lac                                              |
| <b>lhrC5_p_rev</b>      | GGGGGATCCGCTTATACATATAATAACTTTTCTAAAA                                                        | transcriptional fusion of lhrC5 promoter in pTCV-lac                                              |
| <b>lhrA_p_fw</b>        | GGGGGAATTCCTTGCTTTTTTCAAGAACAATAGTAAA<br>AT                                                  | transcriptional fusion of lhrA promoter in pTCV-lac                                               |
| <b>lhrA_p_rev</b>       | GGGGGGATCCTATAACTTATTTACTATTGTTCTTGAA<br>A                                                   | transcriptional fusion of lhrA promoter in pTCV-lac                                               |
| <b>lapB_p_fw</b>        | GGGGGAATTCATAAAGACGCGGTTCCGCGGGG                                                             | transcriptional fusion of lapB promoter in pTCV-lac                                               |
| <b>lapB_p_rev</b>       | GGGGGGATCCTTAAAAGTCCCCAATTATTTTATCCC                                                         | transcriptional fusion of lapB promoter in pTCV-lac                                               |
| <b>lmo1669_p_fw</b>     | GGGGGAATTCGCGTTTTTATCTTTTTTAGGTGG                                                            | transcriptional fusion of lmo1669 promoter in pTCV-lac                                            |
| <b>lmo1669_p_rev</b>    | GGGGGGATCCATAAATAAACAAAACTCACTTCC                                                            | transcriptional fusion of lmo1669 promoter in pTCV-lac                                            |
| <b>pC_lapB_lacZ_fw</b>  | GGGGGAATTCCTTGCTTTTTTCAAGAACAATAGTAAA<br>ATAAGTTATATCAAGTTTGTATAGATAAAAATAGGGG<br>AATA       | translational fusion of LhrA core promoter + lapB (-100 to +32 of translational start) in pCK-lac |
| <b>pC_lapB_lacZ_rev</b> | GGGGGGATCCGTCATCATGCCTATAAAAAATTTACTT<br>TTCATTCAT                                           | translational fusion of LhrA core promoter + lapB (-100 to +32 of translational start) in pCK-lac |
| <b>Vlac-1</b>           | GTTGAATAACACTTATTCCTATC                                                                      | flanking forward primer to check insertions in pTCV-lac and pCK-lac                               |
| <b>Vlac-2</b>           | CTCCACAGTAGTTACACCACC                                                                        | flanking reverse primer to check insertions in pTCV-lac                                           |
| <b>-40 primer</b>       | GTTTTCCAGTCACGACGTTGTAAAACGACGG                                                              | flanking reverse primer to check insertions in pCK-lac.                                           |
| <b>RT-qPCR</b>          |                                                                                              |                                                                                                   |
| <b>lmo0014_fw</b>       | CGATACCGACCGGGATTAAGATATTCAAC                                                                |                                                                                                   |
| <b>lmo0024_fw</b>       | TGAAGAGCGAGAAAAGAAAGCATCAAAAAG                                                               |                                                                                                   |
| <b>lmo0024_rev</b>      | CCCCGAAAATCGTATCACCAACACC                                                                    |                                                                                                   |
| <b>lmo0282_fw</b>       | ACCTTCGTGTTGCCGTCAATC                                                                        |                                                                                                   |
| <b>lmo0282_rev</b>      | CAATGTTACCAAGTGGATCAATCACAAGC                                                                |                                                                                                   |



Table S1, continued

|                       |                                                                                                   |                                                                                                                                                                 |
|-----------------------|---------------------------------------------------------------------------------------------------|-----------------------------------------------------------------------------------------------------------------------------------------------------------------|
| <b>lmo0286_fw</b>     | GCCAGTCCCTGAAGACTTTACAAGTAGC                                                                      |                                                                                                                                                                 |
| <b>lmo0286_rev</b>    | CCAAACTCCCCAAAACCACTACCATCC                                                                       |                                                                                                                                                                 |
| <b>lmo0412_fw</b>     | GCTTAAACTAGCACTAACCCCTGCTTAC                                                                      |                                                                                                                                                                 |
| <b>lmo0412_rev</b>    | CTACACGTTTCGGCTTCAGCTTTTTTC                                                                       |                                                                                                                                                                 |
| <b>lmo1041_fw</b>     | GCTTATGCCAAACAAACGCTCGAAAAC                                                                       |                                                                                                                                                                 |
| <b>lmo1041_rev</b>    | GGCTTCCACGTAGGATAAGACTTGAC                                                                        |                                                                                                                                                                 |
| <b>lmo1054_fw</b>     | AAGGTACAGTTGCTACAGTTGGACAAG                                                                       |                                                                                                                                                                 |
| <b>lmo1054_rev</b>    | TGCTTTTGGTGCTGCGCTTTC                                                                             |                                                                                                                                                                 |
| <b>lmo1493_fw</b>     | TGGGCACGCATTCCATTACAC                                                                             |                                                                                                                                                                 |
| <b>lmo1493_rev</b>    | ATCGGCAATAATCATTTCGCAAAAGTAG                                                                      |                                                                                                                                                                 |
| <b>lapB_fw</b>        | TGATTCACCCACTTGAGACTCCAAAAC                                                                       |                                                                                                                                                                 |
| <b>lapB_rev</b>       | TGCATGAATAGCATTTCAGGGACTAC                                                                        |                                                                                                                                                                 |
| <b>lmo1872_fw</b>     | ATATGATGCAGGTTGCGGGGAAGG                                                                          |                                                                                                                                                                 |
| <b>lmo1872_rev</b>    | TCTAAGCCAACGCTTTGACATTAACACC                                                                      |                                                                                                                                                                 |
| <b>lmo1993_fw</b>     | CCACAAGCAAAATACCAAATCGAAGTACC                                                                     |                                                                                                                                                                 |
| <b>lmo1993_rev</b>    | CGCCTAGAATCATTGCAGCGATTCC                                                                         |                                                                                                                                                                 |
| <b>lmo2353_fw</b>     | GACTATATGTCCAAACACGAGCAGAGAAG                                                                     |                                                                                                                                                                 |
| <b>lmo2353_rev</b>    | AGAGGAACAAATCGGAAGTCTCGAAAAC                                                                      |                                                                                                                                                                 |
| <b>actA_fw</b>        | TCCCACCAATCCCAACAGAAGAAGAG                                                                        |                                                                                                                                                                 |
| <b>actA_rev</b>       | TCGCTGTTTTCGTCATCTGTAAAATCACC                                                                     |                                                                                                                                                                 |
| <b>rpoB_fw</b>        | CGTCGTCTTCGTTCTGTTGG                                                                              |                                                                                                                                                                 |
| <b>rpoB_rev</b>       | G TTCACGAACCACACGTTC                                                                              |                                                                                                                                                                 |
| <b>tpi_fw</b>         | AACACGGCATGACACCAATC                                                                              |                                                                                                                                                                 |
| <b>tpi_rev</b>        | CACGGATTTGACCACGTACC                                                                              |                                                                                                                                                                 |
| <i>EMSA</i>           |                                                                                                   |                                                                                                                                                                 |
| <b>T7_lapB_fw</b>     | GGGGGAATTCTAATACGACTCACTATAGGGTATCAA<br>GTTTGT CATAGATA                                           | synthesis of lapB DNA with T7 promoter to be transcribed into RNA; also for structure probing; used in PCRsIII for mutant construction on PCR I and II products |
| <b>T7_lapB_rev</b>    | GGGGGGATCCTGCTTCTGCTTTCATTCCA                                                                     | synthesis of lapB DNA with T7 promoter to be transcribed into RNA; also for structure probing; used in PCR III for mutant construction on PCR I and II products |
| <b>T7_lhrC4_fw</b>    | GGGGGAATTCTAATACGACTCACTATAGGGATAAGC<br>TAACAACAAACAAAACATTTTCATTCTTCTCCCCCTT<br>TTAGAATGAAAATCCC | synthesis of lhrC4 DNA with T7 promoter to be transcribed into RNA; also for structure probing; PCR with overlapping primers (no template)                      |
| <b>T7_lhrC4_rev</b>   | GGGGGGATCCAAAAAACCGATGCGGAAAAGGGAG<br>TAAACCGCATCGGTCAAAAAGGGAGTTTGGGATTT<br>TCATTCTAAAAGGGG      | synthesis of lhrC4 DNA with T7 promoter to be transcribed into RNA; also for structure probing; PCR with overlapping primers (no template)                      |
| <b>lapB_mut_1_rev</b> | AATTTACTTTTCATTCATCCCATGAGGGAATTTTAAA<br>AGTCCCCCAATTATTTTATC                                     | use with T7_lapB_fw in PCR I; overlaps with lapB_mut_1_fw                                                                                                       |
| <b>lapB_mut_1_fw</b>  | GATAAAATAATTGGGGGACTTTTAAAATCCCTCATG<br>GGGATGAATGAAAAGTAAATT                                     | use with T7_lapB_rev in PCR II; overlaps with lapB_mut_1_rev                                                                                                    |
| <b>lhrC4_mut_2_fw</b> | GGGGGAATTCTAATACGACTCACTATAGGGATAAGC                                                              | use with overlapping                                                                                                                                            |

Table S1, continued

|                           |                                                                                                        |                                                                    |
|---------------------------|--------------------------------------------------------------------------------------------------------|--------------------------------------------------------------------|
|                           | TAACAACAAACAAAACATTTTCATTCTTCTCCCCCTT<br>TTAGAATGAAAATAGAACAG                                          | lhrC4_mut_2_rev primer                                             |
| <b>lhrC4_mut_2_rev</b>    | GGGGGGATCCAAAAAACCGATGCGGAAAAGGGAG<br>TAAACCGCATCGGTGCGGGTTCCTTCTGTTCTATTTTC<br>ATTCTAAAAG             | use with overlapping<br>lhrC4_mut_2_fw primer                      |
| <b>lhrC4_mut_3_fw</b>     | GGGGGAATTCTAATACGACTCACTATAGGGATAAGC<br>TAACAACAAACAAAACATTTTCATTCTTCTCCCCCTT<br>TTAGAATGAAAATCCCAAAC  | use with overlapping<br>lhrC4_mut_3_rev primer                     |
| <b>lhrC4_mut_3_rev</b>    | GGGGGGATCCAAAAAACCGATGCGGTTTTCCCTCT<br>AGTCCGCATCGGTCAAAAAAGGGAGTTTGGGATTTT<br>CATTCTAAAAG             | use with overlapping<br>lhrC4_mut_3_fw primer                      |
| <b>lhrC4_mut_4_fw</b>     | GGGGGAATTCTAATACGACTCACTATAGGGATAAGC<br>TAACAACAAACAAAACATTTTCATTCTAATGGCGGGA<br>AAAAGAATGAAAATCCCAAAC | use with overlapping<br>lhrC4_mut_4_rev primer                     |
| <b>lhrC4_mut_4_rev</b>    | GGGGGGATCCAAAAAACCGATGCGGAAAAGGGAG<br>TAAACCGCATCGGTCAAAAAAGGGAGTTTGGGATTT<br>TCATTCTTTTC              | use with overlapping<br>lhrC4_mut_4_fw primer                      |
| <b>lhrC4_mut_5_fw</b>     | GGGGGAATTCTAATACGACTCACTATAGGGATAAGC<br>TAACAACAAACAAAACATTTTCATTCTTCTCCCCCTT<br>TTAGAATGAAAATAGAACAG  | use with overlapping<br>lhrC4_mut_5_rev primer                     |
| <b>lhrC4_mut_5_rev</b>    | GGGGGGATCCAAAAAACCGATGCGGTTTTCCCTCT<br>AGTCCGCATCGGTGCGGGTTCCTTCTGTTCTATTTTCA<br>TTCTAAAAG             | use with overlapping<br>lhrC4_mut_5_fw primer                      |
| <b>lhrC4_mut_6_fw</b>     | GGGGGAATTCTAATACGACTCACTATAGGGATAAGC<br>TAACAACAAACAAAACATTTTCATTCTAATGGCGGGA<br>AAAAGAATGAAAATAGAACAG | use with overlapping<br>lhrC4_mut_6_rev primer                     |
| <b>lhrC4_mut_6_rev</b>    | GGGGGGATCCAAAAAACCGATGCGGAAAAGGGAG<br>TAAACCGCATCGGTGCGGGTTCCTTCTGTTCTATTTTC<br>ATTCTTTTTC             | use with overlapping<br>lhrC4_mut_6_fw primer                      |
| <b>lhrC4_mut_7_fw</b>     | GGGGGAATTCTAATACGACTCACTATAGGGATAAGC<br>TAACAACAAACAAAACATTTTCATTCTAATGGCGGGA<br>AAAAGAATGAAAATAGAACAG | use with overlapping<br>lhrC4_mut_7_rev primer                     |
| <b>lhrC4_mut_7_rev</b>    | GGGGGGATCCAAAAAACCGATGCGGTTTTCCCTCT<br>AGTCCGCATCGGTGCGGGTTCCTTCTGTTCTATTTTCA<br>TTCTTTTTC             | use with overlapping<br>lhrC4_mut_7_fw primer                      |
| <b>lhrC4_mut_8_fw</b>     | GGGGGAATTCTAATACGACTCACTATAGGGATAAGC<br>TAACAACAAACAAAACATTTTCATTCTAATGGCGGGA<br>AAAAGAATGAAAATCCCAAAC | use with overlapping<br>lhrC4_mut_8_rev primer                     |
| <b>lhrC4_mut_8_rev</b>    | GGGGGGATCCAAAAAACCGATGCGGTTTTCCCTCT<br>AGTCCGCATCGGTCAAAAAAGGGAGTTTGGGATTTT<br>CATTCTTTTTC             | use with overlapping<br>lhrC4_mut_8_fw primer                      |
| <b>lhrC4_mut_stem_fw</b>  | GGGGGAATTCTAATACGACTCACTATAGGGATAAGC<br>TAACAACAAACAAAACAAAAGTAAGATCTCCCCCTT<br>TTTTCTTACTTTTACCCAAAC  | use with overlapping<br>lhrC4_mut_stem_rev primer                  |
| <b>lhrC4_mut_stem_rev</b> | GGGGGGATCCAAAAAACCGATGCGGAAAAGGGAG<br>TAAACCGCATCGGTCAAAAAAGGGAGTTTGGGTAAA<br>AGTAAGAAAAAG             | use with overlapping<br>lhrC4_mut_stem_fw primer                   |
| <b>lapB_mut_stem_rev</b>  | GAAAAGTAAGTTCCCATCTCCCTTTTTTAA                                                                         | use with T7_lapB_fw in PCR I;<br>overlaps with lapB_mut_stem_fw    |
| <b>lapB_mut_stem_fw</b>   | GATGGGGAACCTACTTTTCTAAATTTTTTATAGGCAT<br>GATG                                                          | use with T7_lapB_rev in PCR II;<br>overlaps with lapB_mut_stem_rev |
| <b>lhrC4_mut_9_fw</b>     | GGGGGAATTCTAATACGACTCACTATAGGGATAAGC<br>TAACAACAAACAAAACATTTTCATTCTTGAATGAGGA<br>ACTAGAATGAAAATAG      | use with overlapping<br>lhrC4_mut_9_rev primer                     |
| <b>lhrC4_mut_9_rev</b>    | GGGGGGATCCAAAAAACCGATGCGGGGTTCCCTCA                                                                    | use with overlapping                                               |

Table S1, continued

|                                 |                                                                                                |                                                                                                                                      |
|---------------------------------|------------------------------------------------------------------------------------------------|--------------------------------------------------------------------------------------------------------------------------------------|
|                                 | TCTCCGCATCGGTTCGAGGTTCTTCTGTTCTATTTTCA<br>TTCTAGTTCCTCA                                        | lhrC4_mut_9_fw primer                                                                                                                |
| <b>lapB_mut_9_rev</b>           | CTTTTGGGGTTCCTTCAGTCTGATGAATGAAAAGTAA<br>ATTTTTTAT                                             | use with T7_lapB_fw in PCR I;<br>overlaps with lapB_mut_9_fw                                                                         |
| <b>lapB_mut_9_fw</b>            | CAGACTGAAGGAACCCCAAAGTCCCCAATTATTTT<br>A                                                       | use with T7_lapB_rev in PCR II;<br>overlaps with lapB_mut_9_rev                                                                      |
| <b>lhrC4_mut_10_rev</b>         | AAAAAACCGATGCGGAAAACCGACTAAACCGCATC<br>GGTCAAAAAAGGGAGTTTGGGATTTTCATTCTAAAA<br>GGGG            | use with overlapping T7_lhrC4_fw<br>primer                                                                                           |
| <b>lapB_mut_10_rev</b>          | TTTACTTTTCATTCATCCCCATGTCGGTTTTTTAAAAAGT<br>CCCCAATTATTTTATC                                   | use with T7_lapB_fw in PCR I;<br>overlaps with lapB_mut_10_fw                                                                        |
| <b>lapB_mut_10_fw</b>           | GATAAAATAATTGGGGGACTTTTAAAAAACCGACAT<br>GGGGATGAATGAAAAGTAAA                                   | use with T7_lapB_rev in PCR II;<br>overlaps with lapB_mut_10_rev                                                                     |
| <b>GFP reporter experiments</b> |                                                                                                |                                                                                                                                      |
| <b>lapB_pXG10_fw</b>            | GGGGATGCATTCAAGTTTGTTCATAGATAAAATAGGG<br>G                                                     | synthesis of lapB fragment for<br>insertion into pXG-10; also used in<br>PCR III for mutant construction on<br>PCR I and II products |
| <b>lapB_pXG10_rev</b>           | GGGCGCTAGCAAAAGTCATCATGCCTATAAAAAATTT<br>ACTTTTC                                               | synthesis of lapB fragment for<br>insertion into pXG-10; also used in<br>PCR III for mutant construction on<br>PCR I and II products |
| <b>lhrC4_pNDM220_fw</b>         | GCCTGACGTCGGCAAAAAGAGTGTGACTTGTGAGC<br>GGATAACAATGATACTTAGATTTCATAAGCTAACAA<br>AACAAAAACATTTTC | synthesis of lhrC4 for insertion into<br>pNDM220; also used in PCR III for<br>mutant construction on PCR I and<br>PCR II products    |
| <b>lhrC4_pNDM220_rev</b>        | CCCCGGATCCAAAAAACCGATGCGGAAAAGGGAGT<br>AAACCGCATCGGTCAAAAAAG                                   | synthesis of lhrC4 for insertion into<br>pNDM220; also used in PCR III for<br>mutant construction on PCR I and<br>PCR II products    |
| <b>mut_lapB_pXG10_rev</b>       | CATTCATCCCCCTCCTGAAATTTAAAGTCCCCCAAT<br>TATTTTATCCC                                            | use with lapB_pXG10_fw in PCR I;<br>overlaps with mut_lapB_pXG10_fw                                                                  |
| <b>mut_lapB_pXG10_fw</b>        | CTTTTAAATTTTCAGGAGGGGGGATGAATGAAAAGTA<br>AATTTTTTATAG                                          | use with lapB_pXG10_rev in PCR II;<br>overlaps with mut_lapB_pXG10_rev                                                               |
| <b>mut_lhrC4_pNDM220_rev</b>    | CAAATTTTCAGGACTGGGGATTTTCATTCTAAAAGGGG<br>GGAGAAG                                              | use with lhrC4_pNDM220_fw in<br>PCR I; overlaps with mut_lhrC4_pNDM220_fw                                                            |
| <b>mut_lhrC4_pNDM220_fw</b>     | GAATGAAAATCCCCAGTCTGAAATTTGACCGATGCG<br>GTTTACTCCC                                             | use with lhrC4_pNDM220_rev in<br>PCR II; overlaps with mut_lhrC4_pNDM220_rev                                                         |
| <b>pZE-CAT</b>                  | TGGGATATATCAACGGTGGT                                                                           | flanking primer to check insertions in<br>pXG-10 (Urban & Vogel 2007)                                                                |
| <b>JVO-0155</b>                 | CCGTATGTAGCATCACCTTC                                                                           | flanking primer to check insertions in<br>pXG-10 (Urban & Vogel 2007)                                                                |
| <b>JMJ221</b>                   | TTGTCTCATGAGCGGATACA                                                                           | flanking primer to check insertions in<br>pNDM220                                                                                    |
| <b>JMJ207</b>                   | GGCTCTTCGCTATTACGCG                                                                            | flanking primer to check insertions in<br>pNDM220                                                                                    |

**Table S2. Strains used in this study.**

| <b>Strain</b>                                    | <b>Origin</b> |
|--------------------------------------------------|---------------|
| <i>Listeria monocytogenes</i> serotype 1/2c LO28 | (6)           |
| LO28 $\Delta$ <i>lisR</i>                        | (7)           |
| LO28 $\Delta$ <i>cesR</i>                        | (8)           |
| LO28 $\Delta$ <i>hrC1-4</i>                      | this study    |
| LO28 $\Delta$ <i>hrC5</i>                        | this study    |
| LO28 $\Delta$ <i>hrC1-5</i>                      | this study    |
| LO28 $\Delta$ <i>hfq</i>                         | this study    |
| <i>Escherichia coli</i> TOP10                    | Invitrogen    |
| <i>Escherichia coli</i> DH5a                     | Invitrogen    |

**Table S3. RNA target hitlist.** RNApredator (9) was used to search for direct RNA targets of LhrC1-5. The five top hits of each LhrC copy were combined in a single table. Given are accession numbers, gene names and searching ranks of the target RNAs.

| accession number | gene name   | sequence bound by LhrC1 (rank) | sequence bound by LhrC2 (rank) | sequence bound by LhrC3 (rank) | sequence bound by LhrC4 (rank) | sequence bound by LhrC5 (rank) |
|------------------|-------------|--------------------------------|--------------------------------|--------------------------------|--------------------------------|--------------------------------|
| <i>lmo0014</i>   | <i>qoxB</i> |                                |                                |                                | -19 -> -9 (5)                  |                                |
| <i>lmo0024</i>   |             |                                |                                |                                | -10 -> +8 (1)                  |                                |
| <i>lmo0204</i>   | <i>actA</i> | -16 -> +7 (5)                  | -16 -> +7 (4)                  | -16 -> +7 (4)                  |                                |                                |
| <i>lmo0282</i>   |             |                                |                                |                                | 181 -> +189 (3)                |                                |
| <i>lmo0286</i>   |             | 1065 -> +1075 (3)              | 1065 -> +1075 (2)              | 1065 -> +1075 (2)              |                                |                                |
| <i>lmo0412</i>   |             |                                |                                |                                |                                | -22 -> -2 (3)                  |
| <i>lmo1041</i>   |             |                                |                                |                                | -16 -> +6 (2)                  |                                |
| <i>lmo1054</i>   | <i>pdhC</i> | -85 -> -62 (1)                 |                                |                                |                                | -83 -> -59 (1)                 |
| <i>lmo1493</i>   |             | 445 -> +458 (4)                | 445 -> +458 (3)                | 445 -> +458 (3)                |                                |                                |
| <i>lmo1666</i>   | <i>lapB</i> | -19 -> -5 (2)                  | -19 -> -5 (1)                  | -19 -> -5 (1)                  | -20 -> -5 (4)                  | -18 -> -2 (4)                  |
| <i>lmo1872</i>   |             |                                | 403 -> +416 (5)                | 403 -> +416 (5)                |                                |                                |
| <i>lmo1993</i>   | <i>pdp</i>  |                                |                                |                                |                                | -16 -> +9 (2)                  |
| <i>lmo2353</i>   |             |                                |                                |                                |                                | 1886 -> +1903 (5)              |

**Table S4. RT-qPCR results of 13 putative targets for LhrC.** RT-qPCR results of two biological replicates (each in technical duplicates) are presented for time points 30 min and 60 min for both non-stressed and stressed samples. Absolute ratios as well as log2 ratios of  $\Delta$ lhrC1-5/wt and their technical standard deviations are given. In columns 3, 6, 9 and 12 biological parallels are averaged.

|                |                         | 1                  | 2                  | 3                         | 4                  | 5                  | 6                         | 7                 | 8                 | 9                     | 10                | 11                | 12                    |
|----------------|-------------------------|--------------------|--------------------|---------------------------|--------------------|--------------------|---------------------------|-------------------|-------------------|-----------------------|-------------------|-------------------|-----------------------|
| Accession      | number                  | control<br>1st 30' | control<br>2nd 30' | control<br>30'<br>average | control<br>1st 60' | control<br>2nd 60' | control<br>60'<br>average | stress 1st<br>30' | stress<br>2nd 30' | stress 30'<br>average | stress 1st<br>60' | stress<br>2nd 60' | stress 60'<br>average |
| <i>lmo0014</i> | ratio mutant/wt         | 0,67               | 1,06               | 0,86                      | 0,70               | 0,76               | 0,73                      | 0,86              | 1,60              | 1,23                  | 1,02              | 1,44              | 1,23                  |
|                | standard deviation      | 0,05               | 0,15               |                           | 0,05               | 0,12               |                           | 0,05              | 0,14              |                       | 0,07              | 0,17              |                       |
|                | log2 ratio mutant/wt    | -0,58              | 0,09               | -0,25                     | -0,52              | -0,39              | -0,46                     | -0,22             | 0,68              | 0,23                  | 0,03              | 0,53              | 0,28                  |
|                | standard deviation log2 | 0,02               | 0,01               |                           | 0,02               | 0,03               |                           | 0,01              | 0,06              |                       | 0,00              | 0,06              |                       |
| <i>lmo0024</i> | ratio mutant/wt         | 0,60               | 1,22               | 0,91                      | 0,26               | 1,03               | 0,64                      | 0,76              | 1,05              | 0,90                  | 0,30              | 1,98              | 1,14                  |
|                | standard deviation      | 0,05               | 0,18               |                           | 0,02               | 0,14               |                           | 0,07              | 0,10              |                       | 0,01              | 0,21              |                       |
|                | log2 ratio mutant/wt    | -0,73              | 0,29               | -0,22                     | -1,93              | 0,04               | -0,95                     | -0,39             | 0,07              | -0,16                 | -1,73             | 0,98              | -0,37                 |
|                | standard deviation log2 | 0,02               | 0,04               |                           | 0,01               | 0,00               |                           | 0,02              | 0,01              |                       | 0,01              | 0,10              |                       |
| <i>lmo0204</i> | ratio mutant/wt         | 1,26               | 1,11               | 1,18                      | 0,85               | 0,43               | 0,64                      | 1,23              | 1,16              | 1,19                  | 1,33              | 1,14              | 1,24                  |
|                | standard deviation      | 0,08               | 0,20               |                           | 0,06               | 0,06               |                           | 0,10              | 0,16              |                       | 0,09              | 0,19              |                       |
|                | log2 ratio mutant/wt    | 0,33               | 0,15               | 0,24                      | -0,24              | -1,20              | -0,72                     | 0,30              | 0,21              | 0,26                  | 0,41              | 0,19              | 0,30                  |
|                | standard deviation log2 | 0,02               | 0,03               |                           | 0,01               | 0,03               |                           | 0,03              | 0,03              |                       | 0,03              | 0,03              |                       |
| <i>lmo0282</i> | ratio mutant/wt         | 1,07               | 1,01               | 1,04                      | 0,88               | 0,83               | 0,86                      | 0,19              | 1,18              | 0,69                  | 1,33              | 1,70              | 1,51                  |
|                | standard deviation      | 0,07               | 0,14               |                           | 0,07               | 0,10               |                           | 0,31              | 0,11              |                       | 0,08              | 0,22              |                       |
|                | log2 ratio mutant/wt    | 0,10               | 0,01               | 0,05                      | -0,18              | -0,26              | -0,22                     | -2,37             | 0,24              | -1,06                 | 0,41              | 0,76              | 0,59                  |
|                | standard deviation log2 | 0,01               | 0,00               |                           | 0,01               | 0,02               |                           | 0,14              | 0,02              |                       | 0,02              | 0,10              |                       |
| <i>lmo0286</i> | ratio mutant/wt         | 0,93               | 1,08               | 1,01                      | 0,82               | 0,73               | 0,77                      | 1,06              | 1,15              | 1,11                  | 1,13              | 1,06              | 1,09                  |
|                | standard deviation      | 0,08               | 0,15               |                           | 0,04               | 0,08               |                           | 0,05              | 0,12              |                       | 0,14              | 0,11              |                       |
|                | log2 ratio mutant/wt    | -0,10              | 0,12               | 0,01                      | -0,28              | -0,46              | -0,37                     | 0,09              | 0,20              | 0,15                  | 0,18              | 0,08              | 0,13                  |
|                | standard deviation log2 | 0,01               | 0,02               |                           | 0,01               | 0,03               |                           | 0,00              | 0,02              |                       | 0,02              | 0,01              |                       |
| <i>lmo0412</i> | ratio mutant/wt         | 1,17               | 1,25               | 1,21                      | 0,94               | 1,09               | 1,01                      | 1,23              | 1,46              | 1,35                  | 1,33              | 1,10              | 1,22                  |
|                | standard deviation      | 0,11               | 0,19               |                           | 0,07               | 0,12               |                           | 0,08              | 0,13              |                       | 0,07              | 0,11              |                       |
|                | log2 ratio mutant/wt    | 0,23               | 0,32               | 0,28                      | -0,09              | 0,13               | 0,02                      | 0,30              | 0,55              | 0,43                  | 0,41              | 0,14              | 0,28                  |
|                | standard deviation log2 | 0,02               | 0,05               |                           | 0,01               | 0,01               |                           | 0,02              | 0,05              |                       | 0,02              | 0,01              |                       |
| <i>lmo1041</i> | ratio mutant/wt         | 1,02               | 1,15               | 1,09                      | 0,67               | 1,08               | 0,87                      | 1,27              | 1,89              | 1,58                  | 1,97              | 2,32              | 2,14                  |
|                | standard deviation      | 0,06               | 0,17               |                           |                    | 0,12               |                           | 0,16              | 0,23              |                       | 0,12              | 0,25              |                       |
|                | log2 ratio mutant/wt    | 0,03               | 0,21               | 0,12                      | -0,59              | 0,11               | -0,24                     | 0,35              | 0,92              | 0,63                  | 0,98              | 1,21              | 1,10                  |
|                | standard deviation log2 | 0,00               | 0,03               |                           |                    | 0,01               |                           | 0,04              | 0,11              |                       | 0,06              | 0,13              |                       |
| Accession      |                         | 1                  | 2                  | 3                         | 4                  | 5                  | 6                         | 7                 | 8                 | 9                     | 10                | 11                | 12                    |
|                |                         | control            | control            | control                   | control            | control            | control                   | stress 1st        | stress            | stress 30'            | stress 1st        | stress            | stress 60'            |

Table S4, continued

| number         |                         | 1st 30' | 2nd 30' | 30'   | 1st 60' | 2nd 60' | 60'   | 30'     | 2nd 30' | 60'   | 2nd 60' |      |      |
|----------------|-------------------------|---------|---------|-------|---------|---------|-------|---------|---------|-------|---------|------|------|
|                |                         | average |         |       | average |         |       | average |         |       | average |      |      |
| <i>lmo1054</i> | ratio mutant/wt         | 0,75    | 1,11    | 0,93  | 0,53    | 1,15    | 0,84  | 0,59    | 1,13    | 0,86  | 0,90    | 1,19 | 1,04 |
|                | standard deviation      | 0,05    | 0,17    |       | 0,05    | 0,12    |       | 0,04    | 0,11    |       | 0,06    | 0,13 |      |
|                | log2 ratio mutant/wt    | -0,42   | 0,15    | -0,13 | -0,93   | 0,20    | -0,36 | -0,76   | 0,18    | -0,29 | -0,16   | 0,25 | 0,04 |
|                | standard deviation log2 | 0,01    | 0,02    |       | 0,02    | 0,02    |       | 0,02    | 0,02    |       | 0,01    | 0,03 |      |
| <i>lmo1493</i> | ratio mutant/wt         | 1,02    | 1,02    | 1,02  | 0,89    | 0,76    | 0,82  | 1,21    | 1,20    | 1,20  | 1,50    | 1,27 | 1,38 |
|                | standard deviation      | 0,08    | 0,14    |       | 0,06    | 0,12    |       | 0,06    | 0,12    |       | 0,08    | 0,14 |      |
|                | log2 ratio mutant/wt    | 0,03    | 0,02    | 0,03  | -0,17   | -0,39   | -0,28 | 0,27    | 0,26    | 0,27  | 0,58    | 0,34 | 0,46 |
|                | standard deviation log2 | 0,00    | 0,00    |       | 0,01    | 0,03    |       | 0,01    | 0,03    |       | 0,03    | 0,04 |      |
| <i>lmo1666</i> | ratio mutant/wt         | 1,02    | 1,18    | 1,10  | 0,71    | 0,75    | 0,73  | 1,52    | 1,84    | 1,68  | 3,29    | 3,22 | 3,26 |
|                | standard deviation      | 0,06    | 0,16    |       | 0,05    | 0,09    |       | 0,15    | 0,21    |       | 0,31    | 0,35 |      |
|                | log2 ratio mutant/wt    | 0,03    | 0,23    | 0,13  | -0,49   | -0,41   | -0,45 | 0,61    | 0,88    | 0,74  | 1,72    | 1,69 | 1,70 |
|                | standard deviation log2 | 0,00    | 0,03    |       | 0,02    | 0,03    |       | 0,06    | 0,10    |       | 0,16    | 0,18 |      |
| <i>lmo1872</i> | ratio mutant/wt         | 1,07    | 1,11    | 1,09  | 0,95    | 0,83    | 0,89  | 0,91    | 0,94    | 0,93  | 1,53    | 1,15 | 1,34 |
|                | standard deviation      | 0,07    | 0,16    |       | 0,13    | 0,09    |       | 0,05    | 0,08    |       | 0,12    | 0,12 |      |
|                | log2 ratio mutant/wt    | 0,10    | 0,15    | 0,12  | -0,07   | -0,27   | -0,17 | -0,14   | -0,09   | -0,11 | 0,61    | 0,20 | 0,41 |
|                | standard deviation log2 | 0,01    | 0,02    |       | 0,01    | 0,02    |       | 0,01    | 0,01    |       | 0,05    | 0,02 |      |
| <i>lmo1993</i> | ratio mutant/wt         | 0,99    | 1,24    | 1,12  | 0,55    | 0,88    | 0,71  | 0,98    | 1,26    | 1,12  | 1,21    | 2,22 | 1,72 |
|                | standard deviation      | 0,12    | 0,18    |       | 0,04    | 0,12    |       | 0,09    | 0,13    |       | 0,05    | 0,22 |      |
|                | log2 ratio mutant/wt    | -0,01   | 0,31    | 0,15  | -0,87   | -0,19   | -0,53 | -0,02   | 0,34    | 0,16  | 0,27    | 1,15 | 0,71 |
|                | standard deviation log2 | 0,00    | 0,04    |       | 0,02    | 0,02    |       | 0,00    | 0,04    |       | 0,01    | 0,12 |      |
| <i>lmo2353</i> | ratio mutant/wt         | 0,97    | 1,10    | 1,04  | 0,90    | 0,78    | 0,84  | 0,86    | 0,98    | 0,92  | 1,35    | 1,07 | 1,21 |
|                | standard deviation      | 0,10    | 0,15    |       | 0,06    | 0,11    |       | 0,06    | 0,12    |       | 0,19    | 0,11 |      |
|                | log2 ratio mutant/wt    | -0,04   | 0,13    | 0,05  | -0,15   | -0,35   | -0,25 | -0,22   | -0,03   | -0,12 | 0,44    | 0,09 | 0,27 |
|                | standard deviation log2 | 0,00    | 0,02    |       | 0,01    | 0,03    |       | 0,01    | 0,00    |       | 0,06    | 0,01 |      |

**Table S5. Measuring the promoter activity of *lapB* and *lmo1666*.** The promoter regions of *lapB* and *lmo1666* were fused to *lacZ* in the transcriptional fusion vector pTCV-lac (4), resulting in plasmids pTCV-*lapB* and pTCV-*lmo1666*, respectively. The  $\beta$ -gal activity of LO28 wt and  $\Delta$ *lhrC1-5* strains carrying pTCV-*lapB* and pTCV-*lmo1666* was determined after exposing the cells for 2 hours to 4  $\mu$ g/ml cefuroxime. Unstressed cells were sampled as control. For comparison, the pC-*lapB-lacZ* construct was included in the same assay. The data correspond to the average of a single experiment performed in duplicate. The experiment was repeated twice, showing the same tendency.

|                                                   | <b>pC-<i>lapB-lacZ</i></b> | <b>pTCV-<i>lapB</i></b> | <b>pTCV-<i>lmo1666</i></b> |
|---------------------------------------------------|----------------------------|-------------------------|----------------------------|
| <b>LO28 wt, control</b>                           | 151                        | 0                       | 0                          |
| <b><math>\Delta</math><i>lhrC1-5</i>, control</b> | 150                        | 0                       | 0                          |
| <b>LO28 wt, stress</b>                            | 134                        | 0                       | 0                          |
| <b><math>\Delta</math><i>lhrC1-5</i>, stress</b>  | 307                        | 0                       | 0                          |



## Reference List

1. Lechat,P., Hummel,L., Rousseau,S. and Moszer,I. (2008) GenoList: an integrated environment for comparative analysis of microbial genomes. *Nucleic Acids Res.*, **36**, D469-D474.
2. Mraheil,M.A., Billion,A., Mohamed,W., Mukherjee,K., Kuenne,C., Pischmarov,J., Krawitz,C., Retey,J., Hartsch,T., Chakraborty,T. *et al.* (2011) The intracellular sRNA transcriptome of *Listeria monocytogenes* during growth in macrophages. *Nucleic Acids Res.*, **39**, 4235-4248.
3. Nielsen,J.S., Lei,L.K., Ebersbach,T., Olsen,A.S., Klitgaard,J.K., Valentin-Hansen,P. and Kallipolitis,B.H. (2010) Defining a role for Hfq in Gram-positive bacteria: evidence for Hfq-dependent antisense regulation in *Listeria monocytogenes*. *Nucleic Acids Res.*, **38**, 907-919.
4. Poyart,C. and Trieu-Cuot,P. (1997) A broad-host-range mobilizable shuttle vector for the construction of transcriptional fusions to beta-galactosidase in gram-positive bacteria. *FEMS Microbiol. Lett.*, **156**, 193-198.
5. Christiansen,J.K., Nielsen,J.S., Ebersbach,T., Valentin-Hansen,P., Sogaard-Andersen,L. and Kallipolitis,B.H. (2006) Identification of small Hfq-binding RNAs in *Listeria monocytogenes*. *RNA.*, **12**, 1383-1396.
6. Vazquez-Boland,J.A., Kocks,C., Dramsi,S., Ohayon,H., Geoffroy,C., Mengaud,J. and Cossart,P. (1992) Nucleotide sequence of the lecithinase operon of *Listeria monocytogenes* and possible role of lecithinase in cell-to-cell spread. *Infect. Immun.*, **60**, 219-230.
7. Kallipolitis,B.H., Ingmer,H., Gahan,C.G., Hill,C. and Sogaard-Andersen,L. (2003) CesRK, a two-component signal transduction system in *Listeria monocytogenes*, responds to the presence of cell wall-acting antibiotics and affects beta-lactam resistance. *Antimicrob. Agents Chemother.*, **47**, 3421-3429.
8. Gottschalk,S., Bygebjerg-Hove,I., Bonde,M., Nielsen,P.K., Nguyen,T.H., Gravesen,A. and Kallipolitis,B.H. (2008) The two-component system CesRK controls the transcriptional induction of cell envelope-related genes in *Listeria monocytogenes* in response to cell wall-acting antibiotics. *J. Bacteriol.*, **190**, 4772-4776.
9. Eggenhofer,F., Tafer,H., Stadler,P.F. and Hofacker,I.L. (2011) RNApredator: fast accessibility-based prediction of sRNA targets. *Nucleic Acids Res.*, **39**, W149-W154.
